# Supplementary material for: Lower prevalence of tuberculosis infection in BCG vaccinees: a cross-sectional study in adult prison inmates
Source: HighWire-hosted journal article supplement (doi:10.1136/thoraxjnl-2012-202208), 2012-09-27
Supplement: thoraxjnl-2012-202208supp_apendix.pdf [file thoraxjnl-2012-202208supp_apendix.pdf]

**Appendix Table 1| Cases notified and centrally registered in Taiwan since 1957 with TB notification incidence**

| <b>Remark</b>                                                                                      | <b>Year</b> | <b>Annual Numbers of TB Cases</b> | <b>Incidence (/100,000)</b> |
|----------------------------------------------------------------------------------------------------|-------------|-----------------------------------|-----------------------------|
| <b>Only smear-positive pulmonary TB was required for registry during 1957-1968</b>                 |             |                                   |                             |
|                                                                                                    | 1953-1956   | -                                 | -                           |
|                                                                                                    | 1957        | 2457                              | 25.4                        |
|                                                                                                    | 1958        | 4569                              | 45.5                        |
|                                                                                                    | 1959        | 7012                              | 67.2                        |
|                                                                                                    | 1960        | 5975                              | 55.4                        |
|                                                                                                    | 1961        | 5987                              | 53.7                        |
|                                                                                                    | 1962-1964   | -                                 | -                           |
|                                                                                                    | 1965        | 5602                              | 53.7                        |
|                                                                                                    | 1966        | -                                 | -                           |
|                                                                                                    | 1967        | 5376                              | 53.7                        |
| <b>Cavitary pulmonary TB was included in the registry since 1969</b>                               |             |                                   |                             |
|                                                                                                    | 1968-1969   | -                                 | -                           |
|                                                                                                    | 1970        | 6563                              | 53.7                        |
| <b>Cases with extensive parenchyma involvement was included in the registry since 1974</b>         |             |                                   |                             |
|                                                                                                    | 1971-1974   | -                                 | -                           |
|                                                                                                    | 1975        | 6212                              | 53.7                        |
|                                                                                                    | 1976        | 7193                              | 53.7                        |
|                                                                                                    | 1977        | 6855                              | 40.6                        |
| <b>Pleural TB cases included in the registry since 1978</b>                                        |             |                                   |                             |
|                                                                                                    | 1978        | 6851                              | 39.8                        |
|                                                                                                    | 1979        | 5531                              | 31.5                        |
|                                                                                                    | 1980        | 5829                              | 32.6                        |
| <b>Bacteriology- or pathology-proved extrapulmonary TB was included in the registry since 1981</b> |             |                                   |                             |
|                                                                                                    | 1981        | 6297                              | 34.6                        |
|                                                                                                    | 1982-1984   | -                                 | -                           |
|                                                                                                    | 1985        | 5782                              | 34.6                        |
|                                                                                                    | 1986-1987   | -                                 | -                           |
|                                                                                                    | 1988        | 5774                              | 34.6                        |
| <b>All forms of TB were reported and included in registry since 1991</b>                           |             |                                   |                             |
|                                                                                                    | 1989-1996   | -                                 | -                           |
|                                                                                                    | 1997        | 15386                             | 70.8                        |

|      |       |      |
|------|-------|------|
| 1998 | 14169 | 64.6 |
| 1999 | 13496 | 61.1 |
| 2000 | 13910 | 62.4 |
| 2001 | 14486 | 64.7 |
| 2002 | 16758 | 74.4 |
| 2003 | 15042 | 66.5 |
| 2004 | 16784 | 74.0 |
| 2005 | 16472 | 72.3 |
| 2006 | 15378 | 67.2 |
| 2007 | 14480 | 63.1 |
| 2008 | 14265 | 61.9 |
| 2009 | 13336 | 57.7 |
| 2010 | 13237 | 57.1 |

Note: There were no documented official statistics on annual numbers of reported TB cases during 1962-1964, 1966, 1968-1969, 1971-1974, 1982-1984, 1986-1987, and 1989-1996.

#### References

1. Yu MC, Bai KJ, Chang JH, Lee CN. Age transition of tuberculosis patients in Taiwan, 1957-2001. *J Formos Med Assoc* 2006;**105**:25-30.
2. Provincial Chronic Disease Control Bureau. A review of the tuberculosis control program in Taiwan, 1949-1989: Chronological Development of the Program, BCG vaccination. Taipei, Taiwan: Provincial Chronic Disease Control Bureau; 1991: 4-37.
3. Centers for Disease Control, Department of Health. Taiwan Tuberculosis Control Report 2001. Taipei, Taiwan: CDC 2001.
4. Centers for Disease Control, Department of Health. Taiwan Tuberculosis Control Report 2007. Taipei, Taiwan: CDC 2007. Available at: <http://www.cdc.gov.tw/uploads/files/362cccde-59ac-4fd5-b12f-0af6d54555bd.pdf>
5. Centers for Disease Control, Department of Health. Taiwan Tuberculosis Control Report 2011. Taipei, Taiwan: CDC 2011. Available at: <http://www2.cdc.gov.tw/public/data/219124871.pdf>

**Appendix Table 2| Summary statistics for results of tuberculin skin test.**

| <b>Stratification</b>      | <b>Number of persons</b> | <b>Cutoff for positivity (%)</b> | <b>Cutoff for positivity (%)</b> | <b>Cutoff for positivity (%)</b> |
|----------------------------|--------------------------|----------------------------------|----------------------------------|----------------------------------|
| <b>TST</b>                 | <b>2391</b>              | <b>10mm</b>                      | <b>15mm</b>                      | <b>18mm</b>                      |
| <b>Age (years)</b>         |                          |                                  | <b>N (%)</b>                     |                                  |
| 18-24                      | 177                      | 115 (65)                         | 34 (19)                          | 12 (7)                           |
| 25-34                      | 953                      | 761 (80)                         | 399 (42)                         | 133 (14)                         |
| 35-44                      | 741                      | 647 (87)                         | 397 (54)                         | 154 (21)                         |
| 45-54                      | 381                      | 325 (85)                         | 191 (50)                         | 79 (21)                          |
| 55-64                      | 103                      | 84 (82)                          | 43 (42)                          | 20 (19)                          |
| ≥65                        | 36                       | 26 (72)                          | 16 (44)                          | 7 (19)                           |
| <b>BCG scar number</b>     |                          |                                  | <b>N (%)</b>                     |                                  |
| No inoculation             | 213                      | 160 (75)                         | 100 (47)                         | 45 (21)                          |
| Inoculation once           | 1056                     | 848 (80)                         | 477 (45)                         | 181 (17)                         |
| Booster                    | 1122                     | 950 (85)                         | 503 (45)                         | 179 (16)                         |
| <b>Controlling for age</b> |                          |                                  | <b>N (%)</b>                     |                                  |
| <b>18-35 years</b>         |                          |                                  | <b>N (%)</b>                     |                                  |
| No inoculation             | 65                       | 38 (58)                          | 20 (31)                          | 6 (9)                            |
| Inoculation once           | 564                      | 430 (76)                         | 226 (40)                         | 79 (14)                          |
| Booster                    | 501                      | 408 (81)                         | 187 (37)                         | 60 (12)                          |
| <b>35-54 years</b>         |                          |                                  | <b>N (%)</b>                     |                                  |
| No inoculation             | 98                       | 84 (86)                          | 54 (52)                          | 28 (29)                          |
| Inoculation once           | 440                      | 376 (85)                         | 233 (53)                         | 91 (21)                          |
| Booster                    | 584                      | 512 (88)                         | 301 (55)                         | 114 (20)                         |
| <b>≥55 years</b>           |                          |                                  | <b>N (%)</b>                     |                                  |
| No inoculation             | 50                       | 38 (76)                          | 26 (52)                          | 11 (22)                          |
| Inoculation once           | 52                       | 42 (81)                          | 18 (35)                          | 11 (21)                          |
| Booster                    | 37                       | 30 (81)                          | 15 (41)                          | 5 (14)                           |

BCG= Bacillus Calmette-Guérin
